# Supplementary material
Source: Springer Nature journal article supplement (https://www.springermedizin.de/resource/supplementary/12894_2005_59_MOESM4_ESM.pdf/9513898)

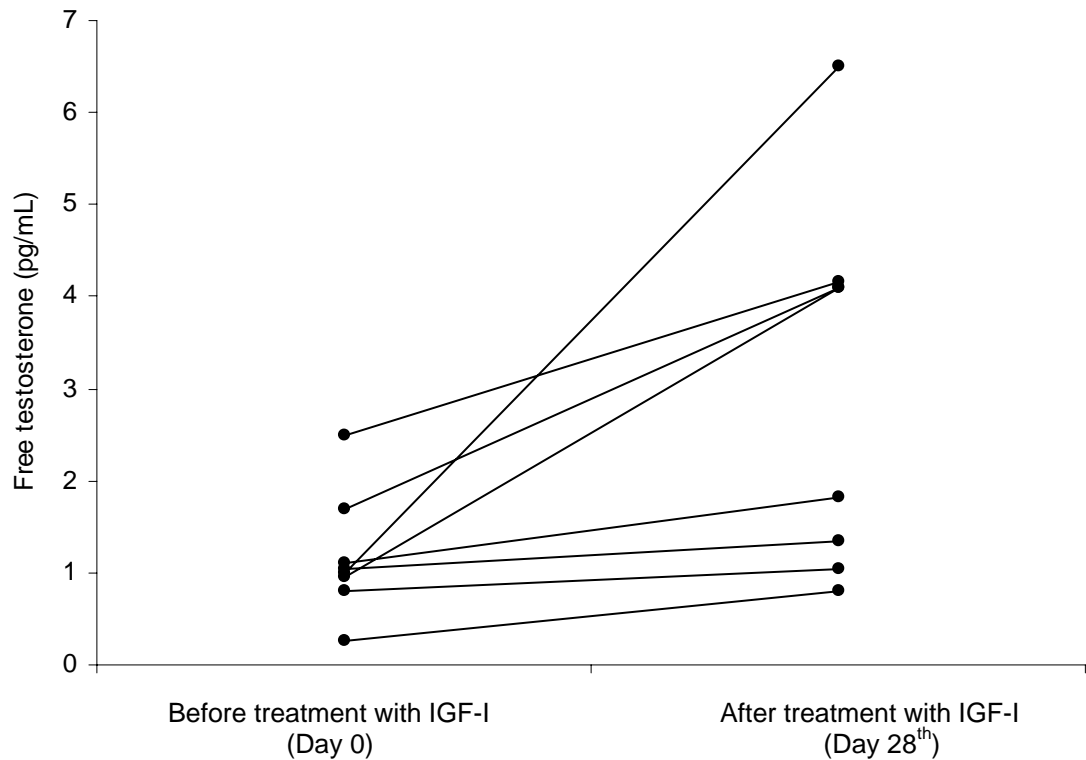

**p<0.05**

Supplement: MOESM4 [file 9513898]
